# Supplementary material for: Personalized Explanations for Early Diagnosis of Alzheimer’s Disease Using Explainable Graph Neural Networks with Population Graphs
Source: MDPI journal article supplement (doi:10.3390/bioengineering10060701), 2023-06-08
Supplement: s1 [file s1]

# Supplementary Materials: Personalized Explanations for Early Diagnosis of Alzheimer's Disease Using Explainable Graph Neural Networks with Population Graphs

So Yeon Kim <sup>1,2</sup>

<sup>1</sup> Department of Artificial Intelligence, Ajou University, Suwon 16499, Republic of Korea; jebi1771@ajou.ac.kr

<sup>2</sup> Department of Software and Computer Engineering, Ajou University, Suwon 16499, Republic of Korea

## 1. Ablation Study

### 1.1. Optimizing Network Density of Graph Neural Networks

To determine the optimal number of edges ( $M$ ) of a population graph, we conducted an ablation study to assess performance outcomes associated with varying network densities, as illustrated in Figure S1. Moreover, we visualized the final embeddings generated by each GCN model in Figure S2. Our analysis demonstrated that GCN models with randomly assigned edges significantly underperformed compared to the GCN-corr, irrespective of network density. This is further evidenced by Figure S2, highlighting the inability of such models to effectively differentiate between  $A\beta$  positive and negative samples. Conversely, the GCN-corr model demonstrated superior performance and more informative embeddings. These results affirm the effectiveness of our proposed method for population graph construction. Notably, the GCN-corr model achieved its best performance at a network density of merely 1%, but it was also able to maintain the correlation structure to some extent at higher densities. These findings highlights the crucial role of careful network density selection of population graphs in designing efficient GCN models.

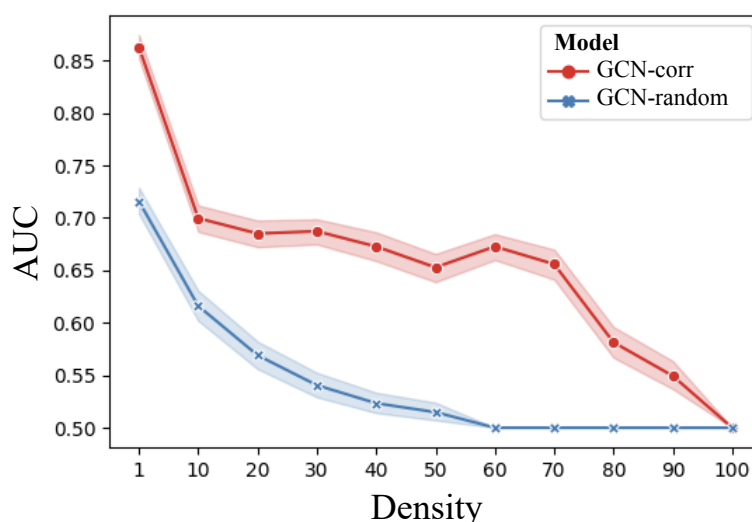

**Figure S1.** Performances of the GCN-corr and GCN-random models, as network density varies from a sparse 1% connectivity to a fully connected 100% connectivity network, in increments of 10%. Performance metrics are calculated as the mean Area Under the ROC Curve (AUC) with a 95% confidence interval, derived from 10 repetitions of 5-fold cross-validation. The confidence interval's upper and lower bounds are visually represented as a shaded area surrounding the line.

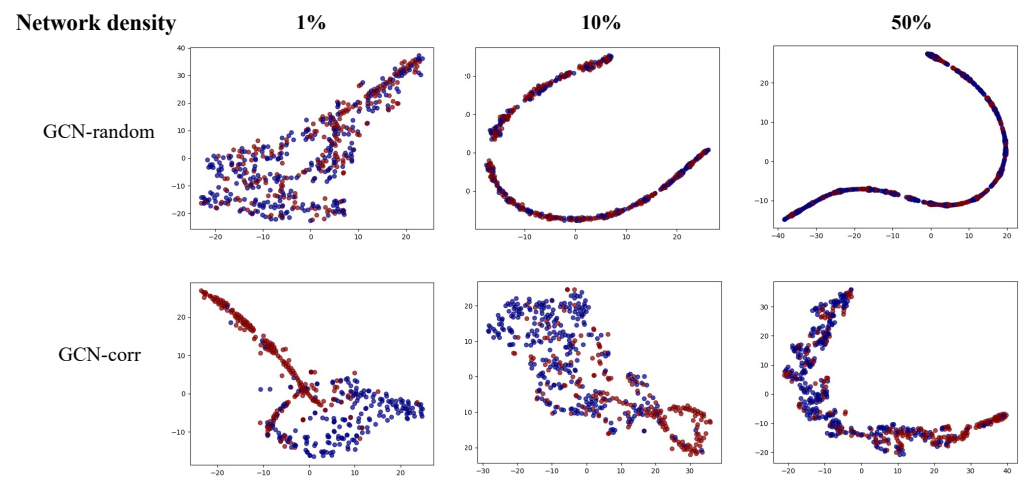

**Figure S2.** Visual representation of the final node embedding of the GCN-random and GCN-corr models at selected network densities of 1%, 10%, and 50%. These densities were chosen to provide a clear comparison across varying levels of network densities. Nodes representing A $\beta$  positive samples are colored blue, while those representing A $\beta$  negative samples are in red.

## 2. Supplementary Table

16

**Table S1.** The top-10 prioritized biomarkers from demographic and neuroimaging features, along with their corresponding averaged feature importance scores, listed in descending order. The biomarkers are divided into four groups (A-D) based on the results of heatmap clustering.

| Group | Feature                          | Averaged Score |
|-------|----------------------------------|----------------|
| A     | Left Precentral                  | 0.9954         |
|       | Right Precentral                 | 0.9027         |
|       | APOE $\epsilon 4$                | 0.8985         |
|       | Left Caudal Middle Frontal       | 0.8951         |
|       | Right Superior Frontal           | 0.8116         |
|       | Age                              | 0.7965         |
|       | Left Transverse Temporal         | 0.6984         |
|       | Left Cuneus                      | 0.4502         |
|       | Right Rostral Anterior Cingulate | 0.4399         |
|       | Right Temporal Pole              | 0.3009         |
| B     | Left Precentral                  | 0.9516         |
|       | Age                              | 0.7768         |
|       | Left Caudal Middle Frontal       | 0.7382         |
|       | Right Superior Frontal           | 0.7109         |
|       | Right Precentral                 | 0.7048         |
|       | Right Temporal Pole              | 0.6513         |
|       | Left Transverse Temporal         | 0.6502         |
|       | Left Temporal Pole               | 0.6380         |
|       | Left Superior Frontal            | 0.6227         |
|       | Left Cuneus                      | 0.5842         |
| C     | Left Precuneus                   | 0.7137         |
|       | Right Isthmus Cingulate          | 0.6937         |
|       | Right Lateral Occipital          | 0.6729         |
|       | Education (years)                | 0.6725         |
|       | Left Superior Parietal           | 0.6614         |
|       | Right Superior Temporal          | 0.6404         |
|       | Right Inferior Temporal          | 0.6382         |
|       | Left Rostral Anterior Cingulate  | 0.6276         |
|       | Left Isthmus Cingulate           | 0.6268         |
|       | Sex                              | 0.6160         |
| D     | Education (years)                | 0.9970         |
|       | Right Precuneus                  | 0.9804         |
|       | Left Precuneus                   | 0.9762         |
|       | Left Pars Orbitalis              | 0.9749         |
|       | Right Posterior Cingulate        | 0.9672         |
|       | Left Entorhinal                  | 0.9601         |
|       | Right Fusiform                   | 0.9523         |
|       | Left Medial Orbitofrontal        | 0.9451         |
|       | Right Lateral Occipital          | 0.9343         |
|       | Right Isthmus Cingulate          | 0.9228         |
