# Supplementary figures and images for: Personalized Explanations for Early Diagnosis of Alzheimer’s Disease Using Explainable Graph Neural Networks with Population Graphs
Source: MDPI journal article supplement (doi:10.3390/bioengineering10060701), 2023-06-08

**Network density**

**1%**

**10%**

**50%**

GCN-random

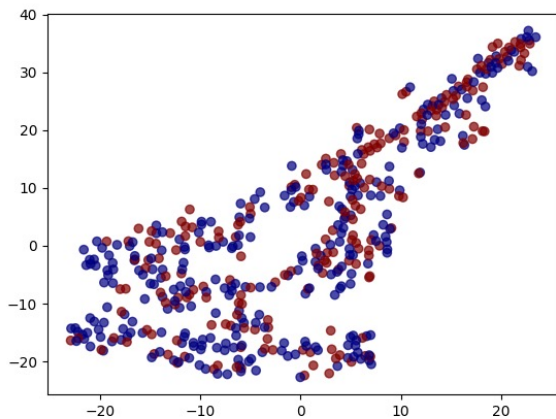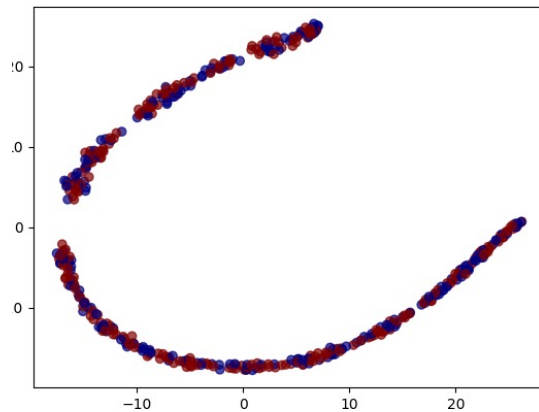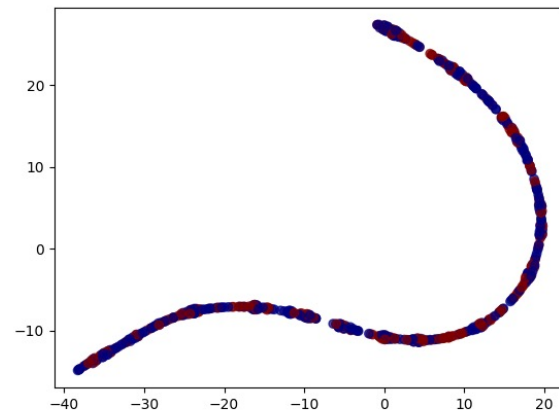

GCN-corr

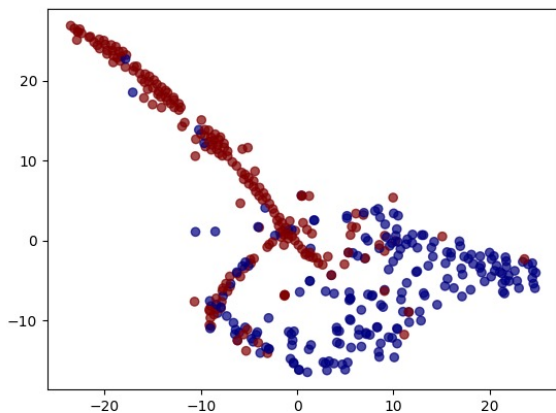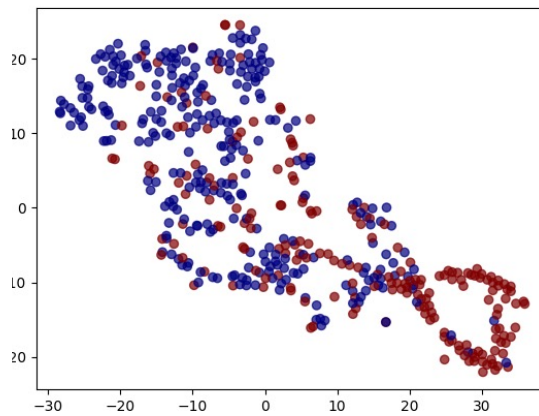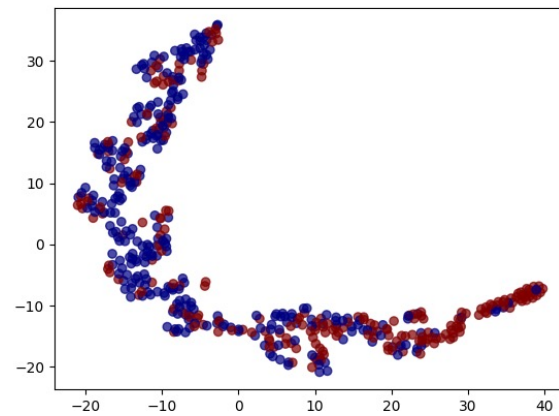

Supplement: s1 [file s1]

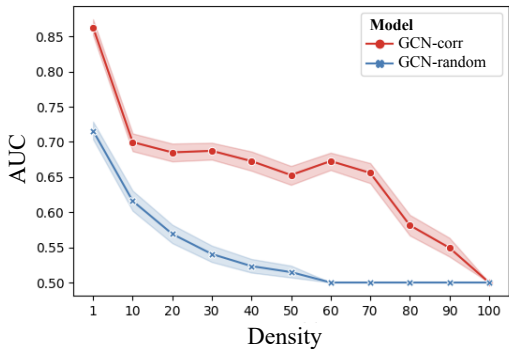

Supplement: s1 [file s1]
